# Supplementary material for: Simultaneous Determination of Fourteen Marker Compounds in the Traditional Herbal Prescription, Geumgwesingihwan, Using Ultra-Performance Liquid Chromatography–Tandem Mass Spectrometry
Source: MDPI journal article supplement (doi:10.3390/molecules27123890), 2022-06-17
Supplement: s1 [file s1]

**Table S1.** UPLC–MS/MS conditions for simultaneous analysis of the 14 marker components in GSH samples.

| UPLC conditions    |                                                                   | MS/MS conditions        |                        |
|--------------------|-------------------------------------------------------------------|-------------------------|------------------------|
| LC system          | Acquity UPLC H-Class                                              | MS system               | Xevo TQ-S micro        |
| Column             | Acquity UPLC BEH C <sub>18</sub> column (2.1 mm × 100 mm, 1.7 μm) | MS software             | MassLynx (version 4.2) |
| Column temperature | 40 °C                                                             | Ionization source       | ESI                    |
| Sample temperature | 5 °C                                                              | Ionization mode         | Positive/Negative      |
| Injection volume   | 2.0 μL                                                            | Acquisition mode        | MRM                    |
| Flow rate          | 0.3 mL/min                                                        | Capillary voltage       | 3.3 kV                 |
| Mobile phase A     | 0.1% (v/v) Acetic acid in distilled water                         | Cone gas flow           | 80 L/h                 |
| Mobile phase B     | 0.1% (v/v) Acetic acid in acetonitrile                            | Desolvation gas flow    | 600 L/h                |
|                    | Time (min)    A (%)    B (%)                                      | Desolvation temperature | 300 °C                 |
| Gradient elution   | 0.00                                                              | Source temperature      | 150 °C                 |
|                    | 11.43                                                             |                         |                        |
|                    | 14.29                                                             |                         |                        |
|                    | 15.71                                                             |                         |                        |
|                    | 17.14                                                             |                         |                        |
|                    | 20.00                                                             |                         |                        |

**Table S2.** Repeatability of retention time of the 14 marker analytes in the developed UPLC–MS/MS MRM assay (n = 6).

| Analyte   | Retention time |       |       |       |       |       | Mean  | SD   | CV (%) |
|-----------|----------------|-------|-------|-------|-------|-------|-------|------|--------|
|           | 1              | 2     | 3     | 4     | 5     | 6     |       |      |        |
| <b>1</b>  | 0.79           | 0.79  | 0.80  | 0.79  | 0.79  | 0.80  | 0.79  | 0.01 | 0.65   |
| <b>2</b>  | 1.43           | 1.46  | 1.48  | 1.48  | 1.49  | 1.49  | 1.47  | 0.02 | 1.57   |
| <b>3</b>  | 2.15           | 2.18  | 2.19  | 2.21  | 2.21  | 2.21  | 2.19  | 0.02 | 1.10   |
| <b>4</b>  | 2.43           | 2.47  | 2.47  | 2.50  | 2.50  | 2.50  | 2.48  | 0.03 | 1.12   |
| <b>5</b>  | 3.48           | 3.52  | 3.53  | 3.55  | 3.55  | 3.54  | 3.53  | 0.03 | 0.75   |
| <b>6</b>  | 4.14           | 4.16  | 4.17  | 4.18  | 4.18  | 4.17  | 4.17  | 0.02 | 0.36   |
| <b>7</b>  | 4.17           | 4.19  | 4.20  | 4.21  | 4.21  | 4.21  | 4.20  | 0.02 | 0.38   |
| <b>8</b>  | 4.72           | 4.75  | 4.76  | 4.77  | 4.77  | 4.76  | 4.76  | 0.02 | 0.39   |
| <b>9</b>  | 5.25           | 5.25  | 5.25  | 5.25  | 5.26  | 5.25  | 5.25  | 0.00 | 0.08   |
| <b>10</b> | 5.29           | 5.32  | 5.33  | 5.33  | 5.33  | 5.33  | 5.32  | 0.02 | 0.30   |
| <b>11</b> | 5.89           | 5.91  | 5.92  | 5.93  | 5.92  | 5.93  | 5.92  | 0.02 | 0.25   |
| <b>12</b> | 7.98           | 7.99  | 7.99  | 7.99  | 7.99  | 7.99  | 7.99  | 0.00 | 0.05   |
| <b>13</b> | 8.92           | 8.98  | 9.00  | 9.00  | 9.00  | 9.00  | 8.98  | 0.03 | 0.36   |
| <b>14</b> | 15.52          | 15.53 | 15.53 | 15.53 | 15.53 | 15.53 | 15.53 | 0.00 | 0.03   |

Allantoin (**1**), gallic acid (**2**), 5-(hydroxymethyl)furfural (**3**), geniposidic acid (**4**), oxypaeoniflorin (**5**), loganin (**6**), geniposide (**7**), paeoniflorin (**8**), ecdysterone (**9**), verbascoside (**10**), cornuside (**11**), benzoylpaeoniflorin (**12**), paeonol (**13**), and alisol B acetate (**14**).

**Table S3.** Composition of GSH.

| Botanical name                | Scientific name                                                        | Family         | Used part  | Origin          | Amount (g) | Ratio (%) |
|-------------------------------|------------------------------------------------------------------------|----------------|------------|-----------------|------------|-----------|
| Rehmanniae Radix<br>Preparata | <i>Rehmannia glutinosa</i> (Gaertn.) DC.                               | Plantaginaceae | Root       | Jeongeup, Korea | 1481.4     | 29.7      |
| Dioscoreae Rhizoma            | <i>Dioscorea japonica</i> Thunb.                                       | Dioscoreaceae  | Rhizome    | Korea           | 740.7      | 14.8      |
| Corni Fructus                 | <i>Cornus officinalis</i> Siebold & Zucc.                              | Cornaceae      | Fruit      | Gurye, Korea    | 740.7      | 14.8      |
| Poria Sclerotium              | <i>Poria cocos</i> Wolf                                                | Polyporaceae   | Sclerotium | Binghwa, Korea  | 555.6      | 11.1      |
| Moutan Radicis Cortex         | <i>Paeonia suffruticosa</i> Andrews                                    | Paeoniaceae    | Root bark  | Imsil, Korea    | 555.6      | 11.1      |
| Alisamatis Rhizoma            | <i>Alisma plantago-aquatica</i> subsp.<br><i>orientale</i> (Sam.) Sam. | Alismataceae   | Rhizome    | Imsil, Korea    | 555.6      | 11.1      |
| Achyranthis Radix             | <i>Achyranthes bidentate</i> Blume                                     | Amaranthaceae  | Root       | Hwasun, Korea   | 185.2      | 3.7       |
| Plantaginis Semen             | <i>Plantago asiatica</i> L.                                            | Plantaginaceae | Seed       | China           | 185.2      | 3.7       |
|                               |                                                                        |                |            | Total           | 5000.0     | 100.0     |

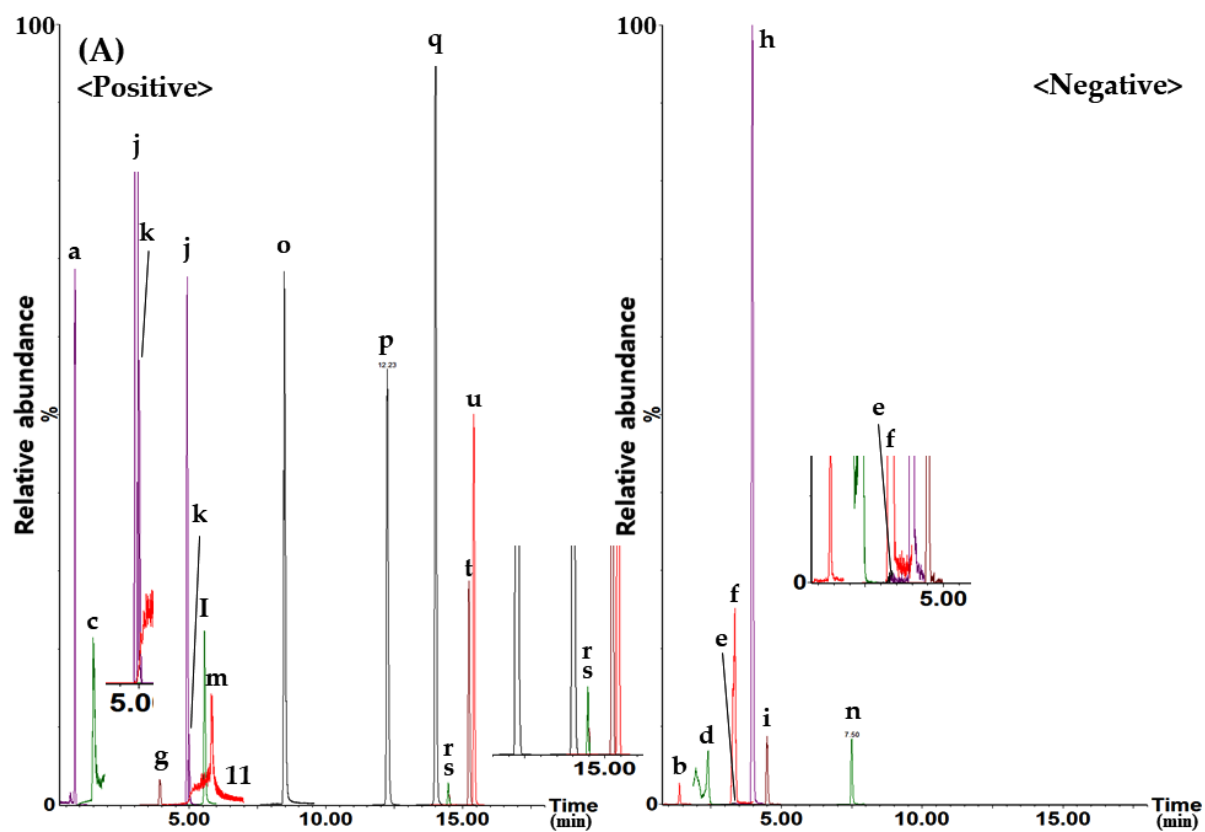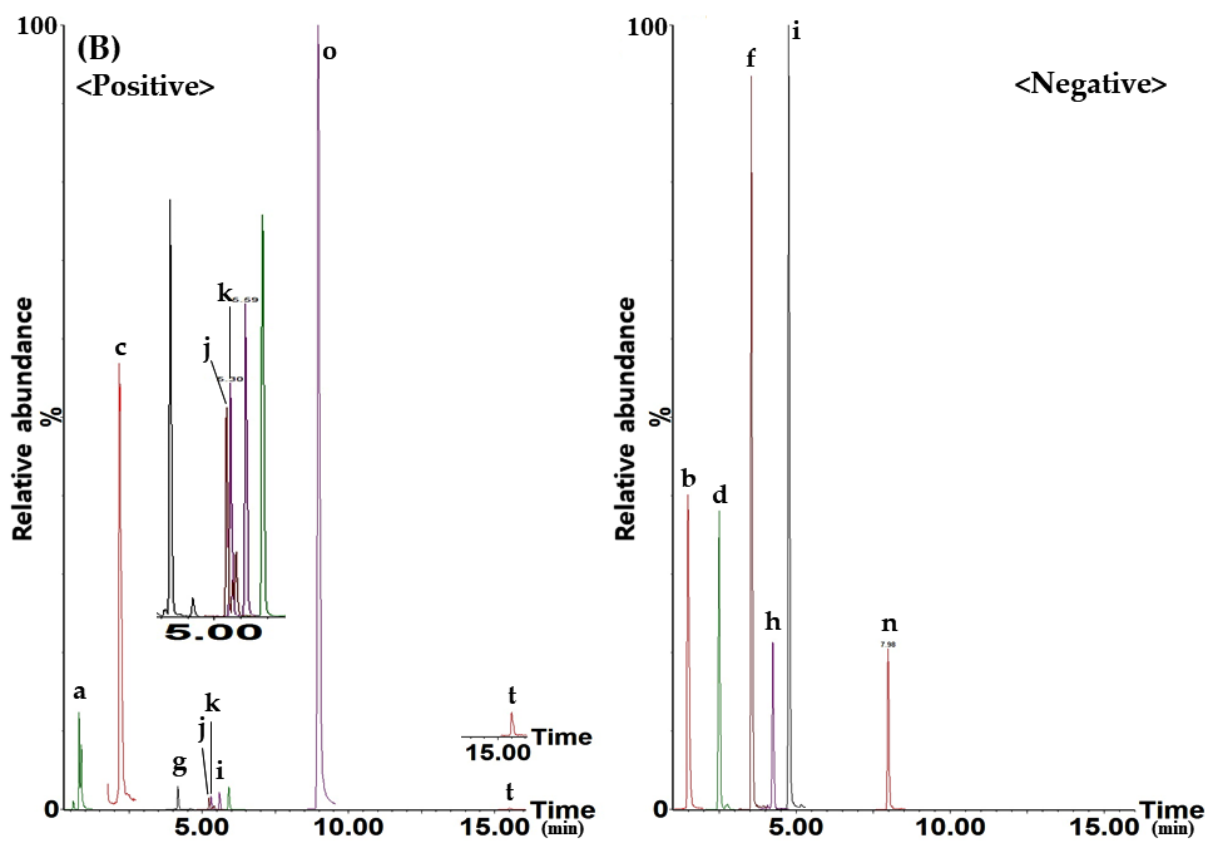

**Figure S1.** Total ion chromatograms of the 21 investigated standard component mixtures (A) and GSH sample (B) obtained using the UPLC–MS/MS MRM method in the positive and negative ion modes. Allantoin (**a**), gallic acid (**b**), 5-(hydroxymethyl)furfural (**c**), geniposidic acid (**d**), morroniside (**e**), oxypaeoniflorin (**f**), loganin (**g**), geniposide (**h**), paeoniflorin (**i**), ecdysterone (**j**), verbascoside (**k**), cornuside (**l**), benzoic acid (**m**), benzoylpaeoniflorin (**n**), paeonol (**o**), dioscin (**p**), polyporenic acid C (**q**), sweroside (**r**), alisol B (**s**), alisol B acetate (**t**), and pachymic acid (**u**).

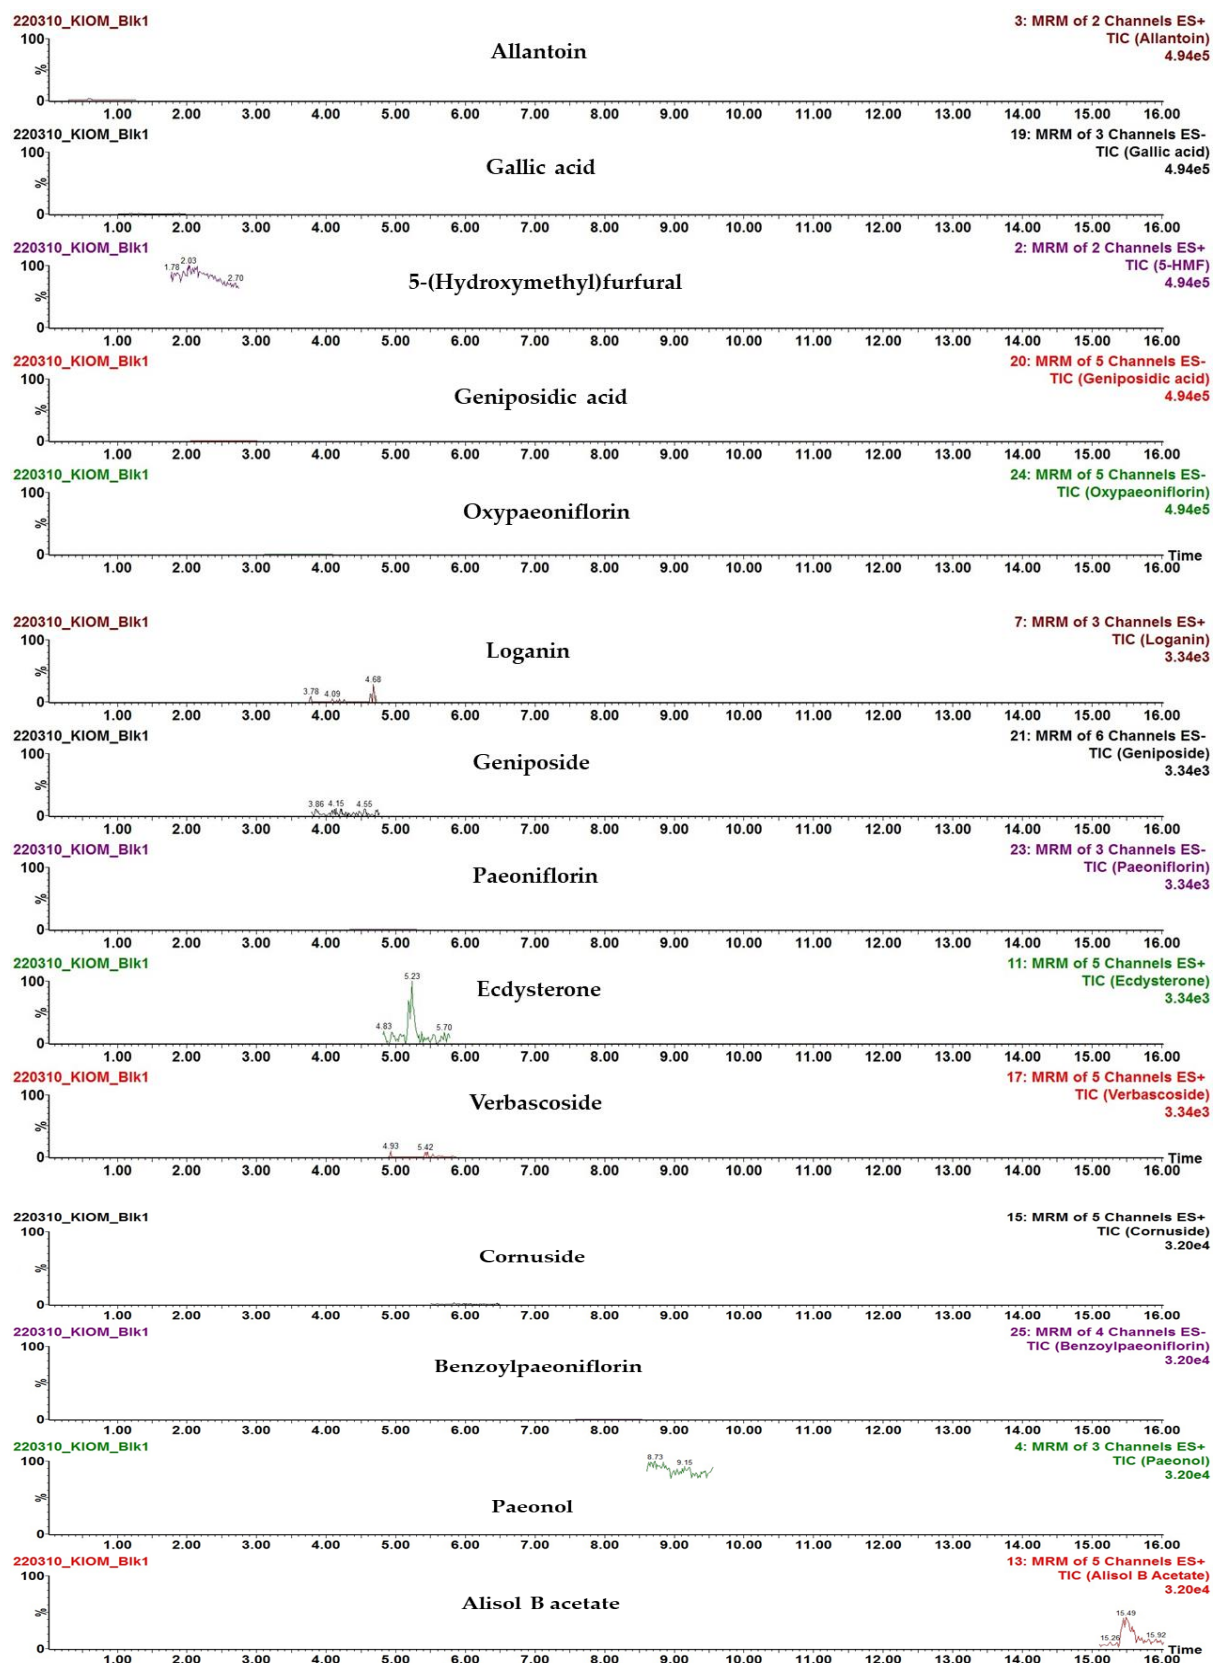

Figure S2. Extracted ion chromatograms for blank of each marker compound.

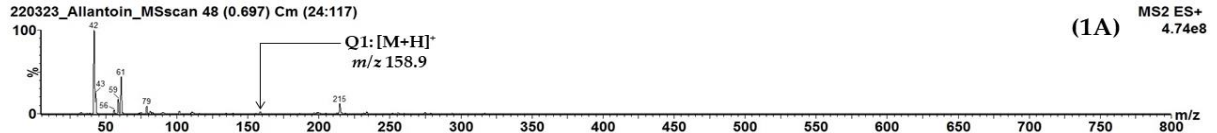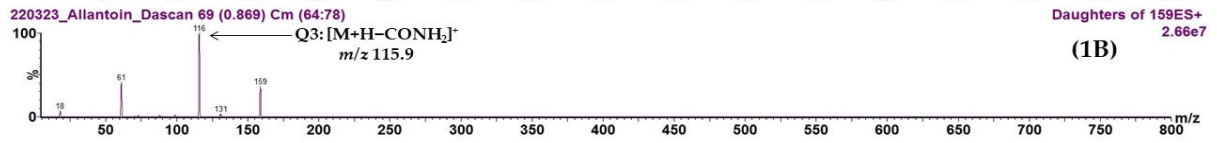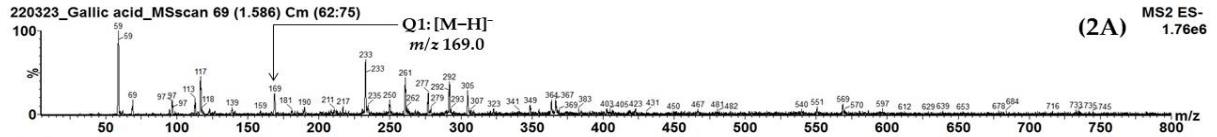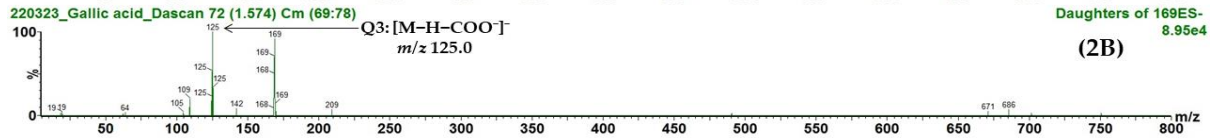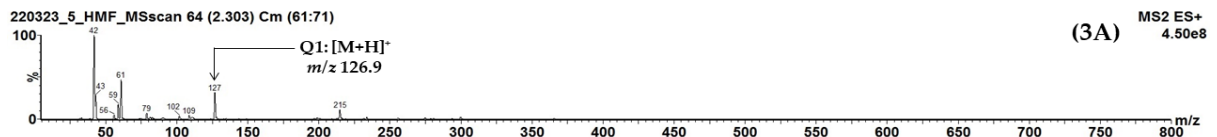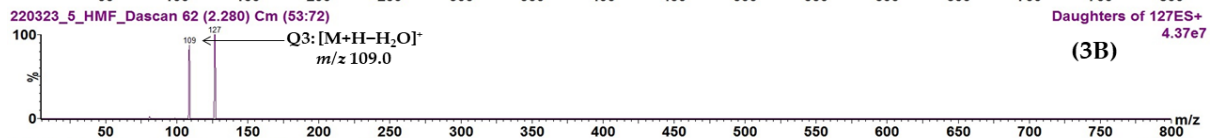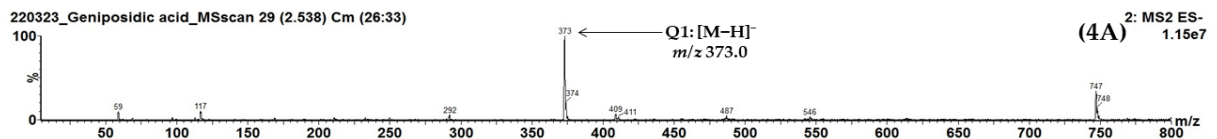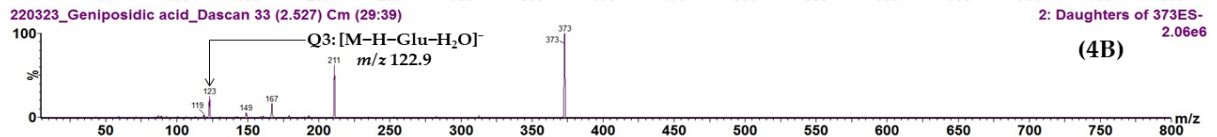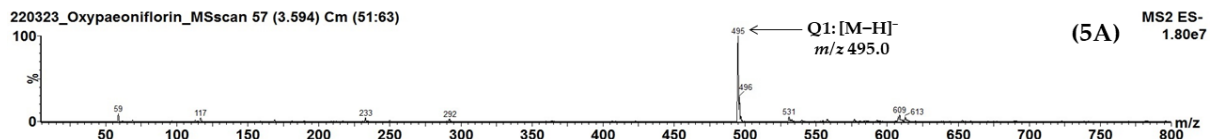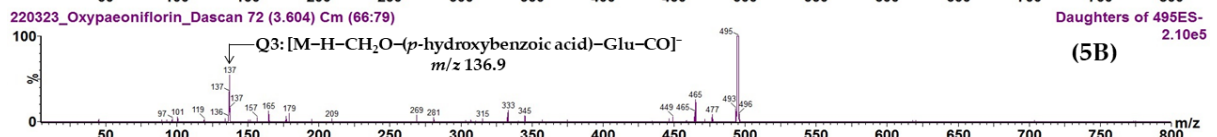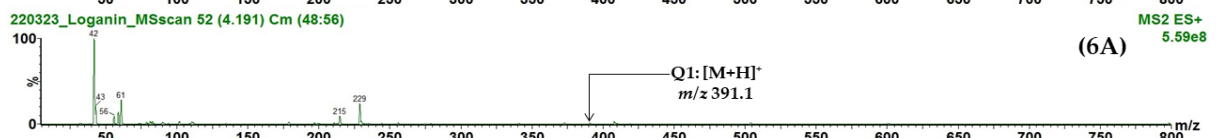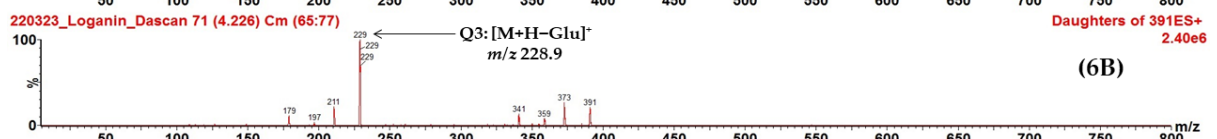

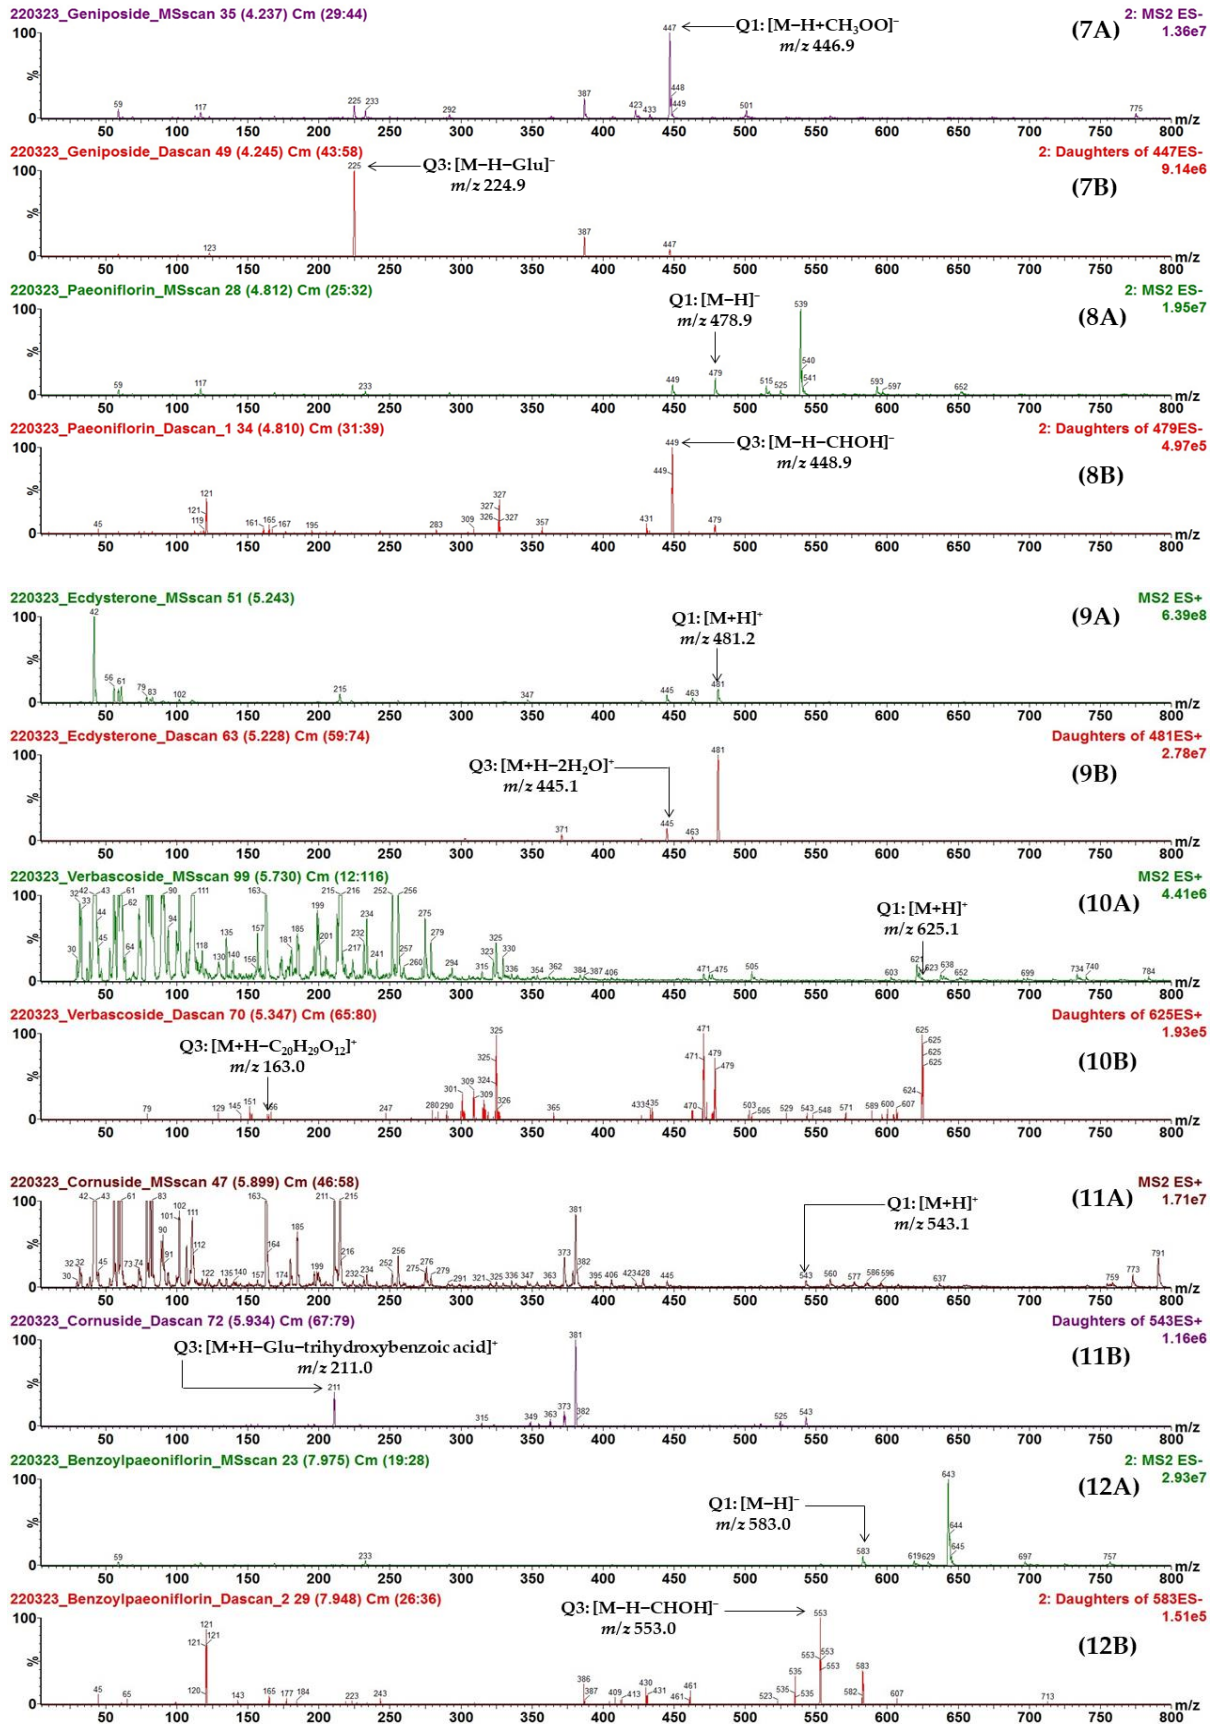



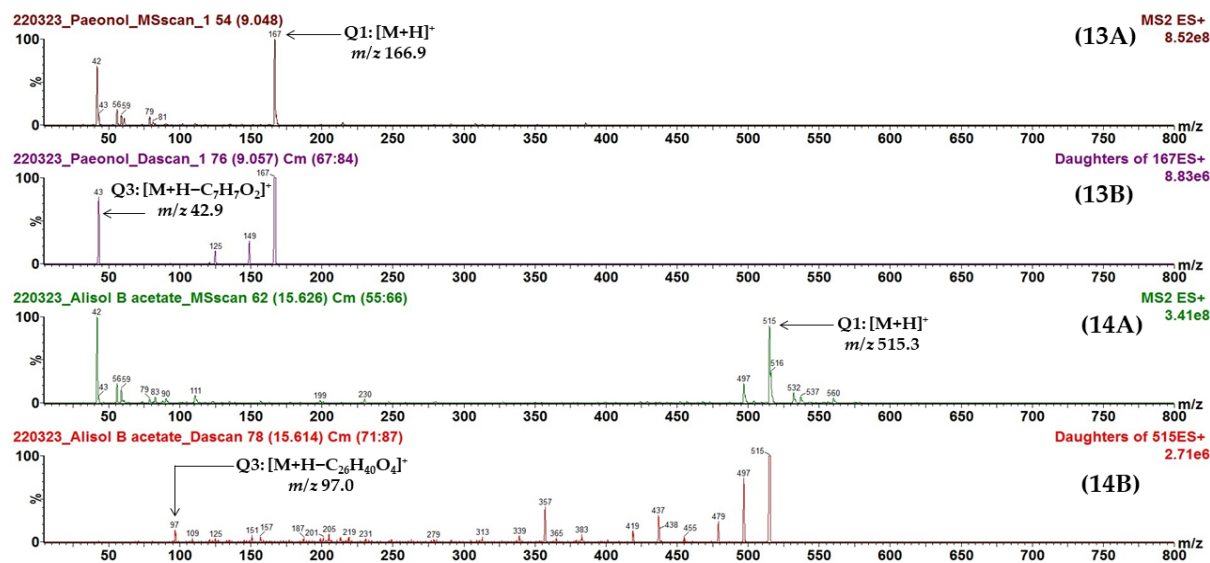

**Figure S3.** Q1 (A) and Q3 (B) mass spectra of 14 marker components. Allantoin (1), gallic acid (2), 5-(hydroxymethyl)furfural (3), geniposidic acid (4), oxypaeoniflorin (5), loganin (6), geniposide (7), paeoniflorin (8), ecdysterone (9), verbascoside (10), cornuside (11), benzoylpaeoniflorin (12), paeonol (13), and alisol B acetate (14).

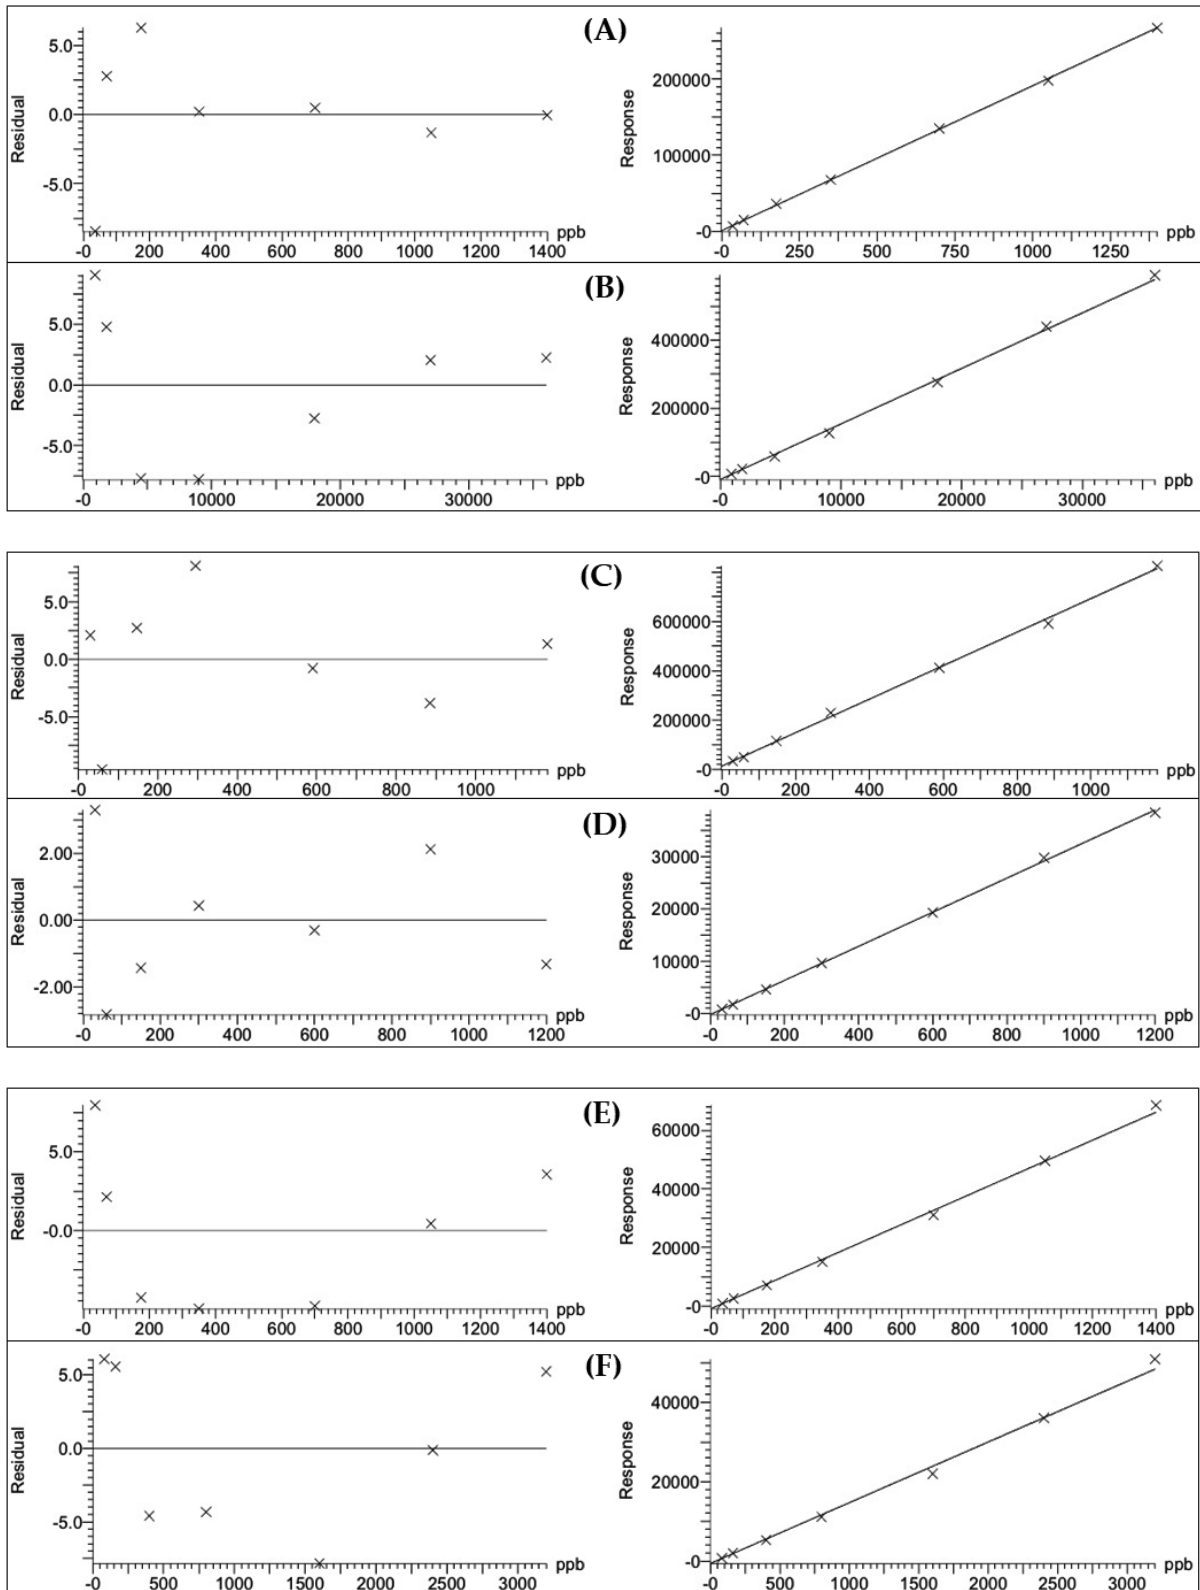

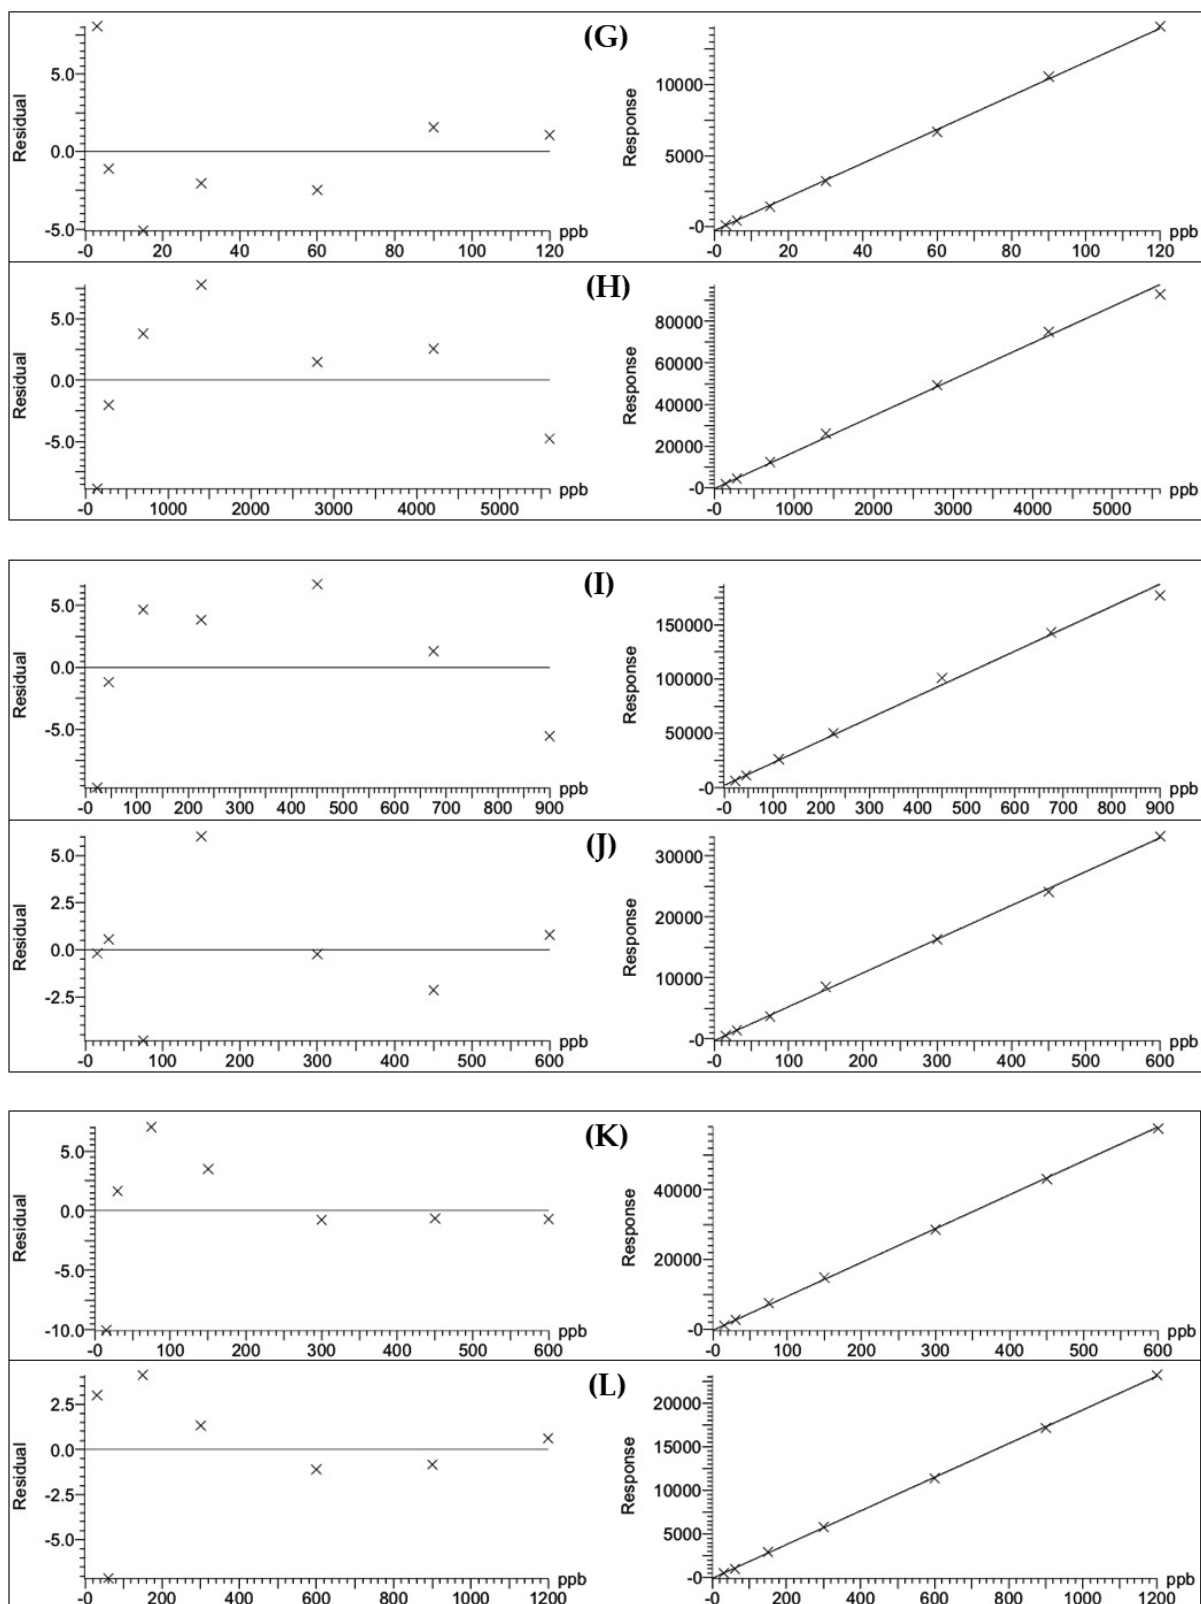

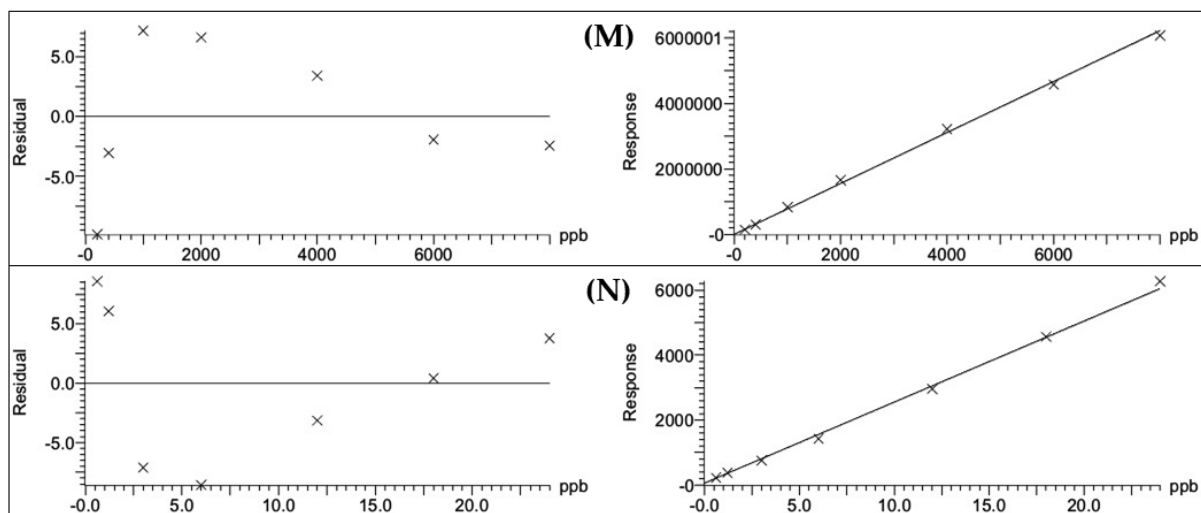

**Figure S4.** Calibration curves and residuals of 14 marker components. A; allantoin, B; gallic acid, C; 5-(hydroxymethyl)furfural, D; geniposidic acid, E; oxypaeoniflorin, F; loganin, G; geniposide, H; paeoniflorin, I; ecdysterone, J; verbascoside, K; cornuside, L; benzoylpaeoniflorin, M; paeonol, and N; alisol B acetate.

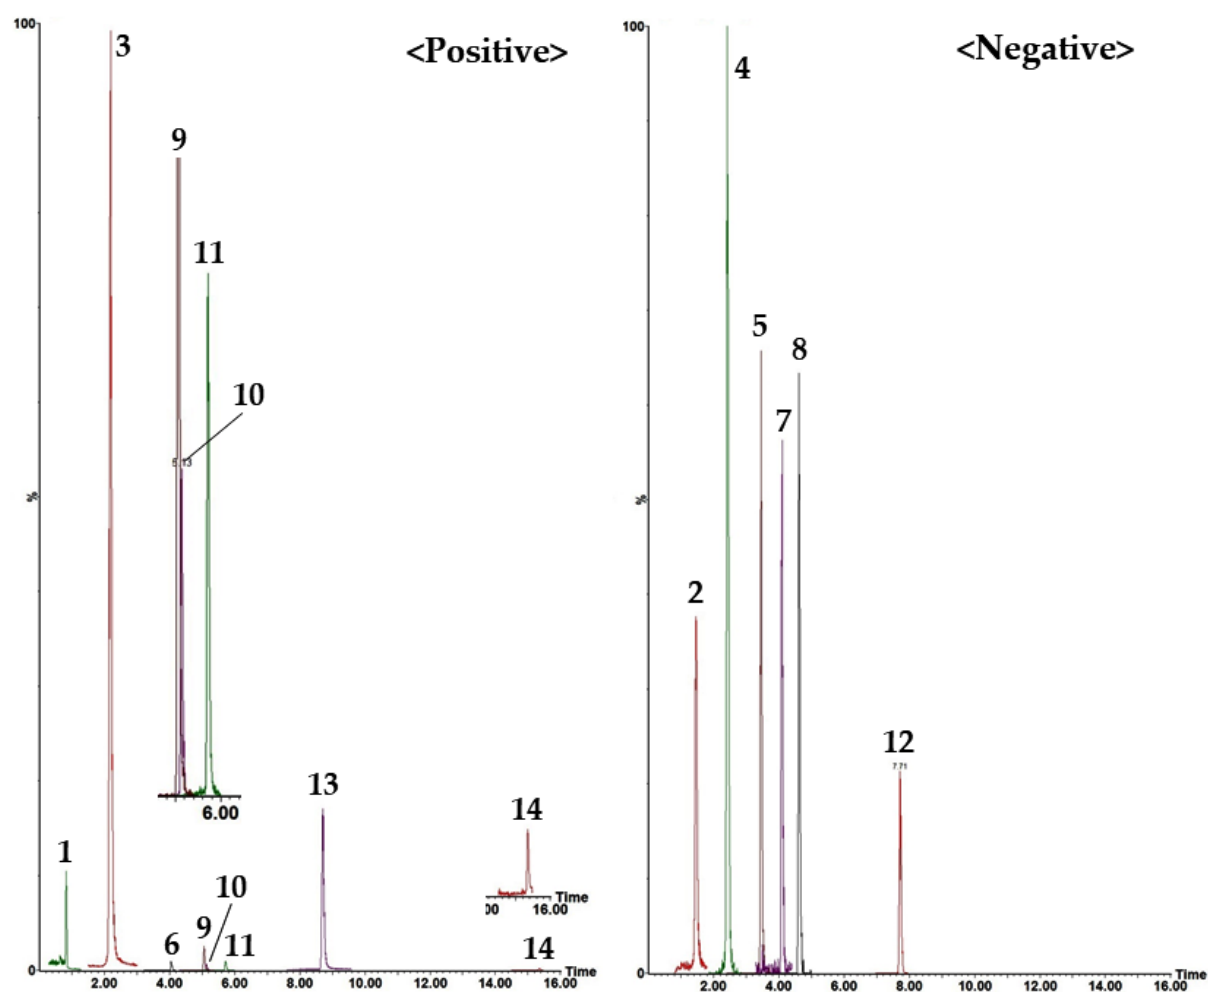

**Figure S5.** Total ion chromatogram of LOD using the UPLC-MS/MS MRM method in the positive and negative ion modes.

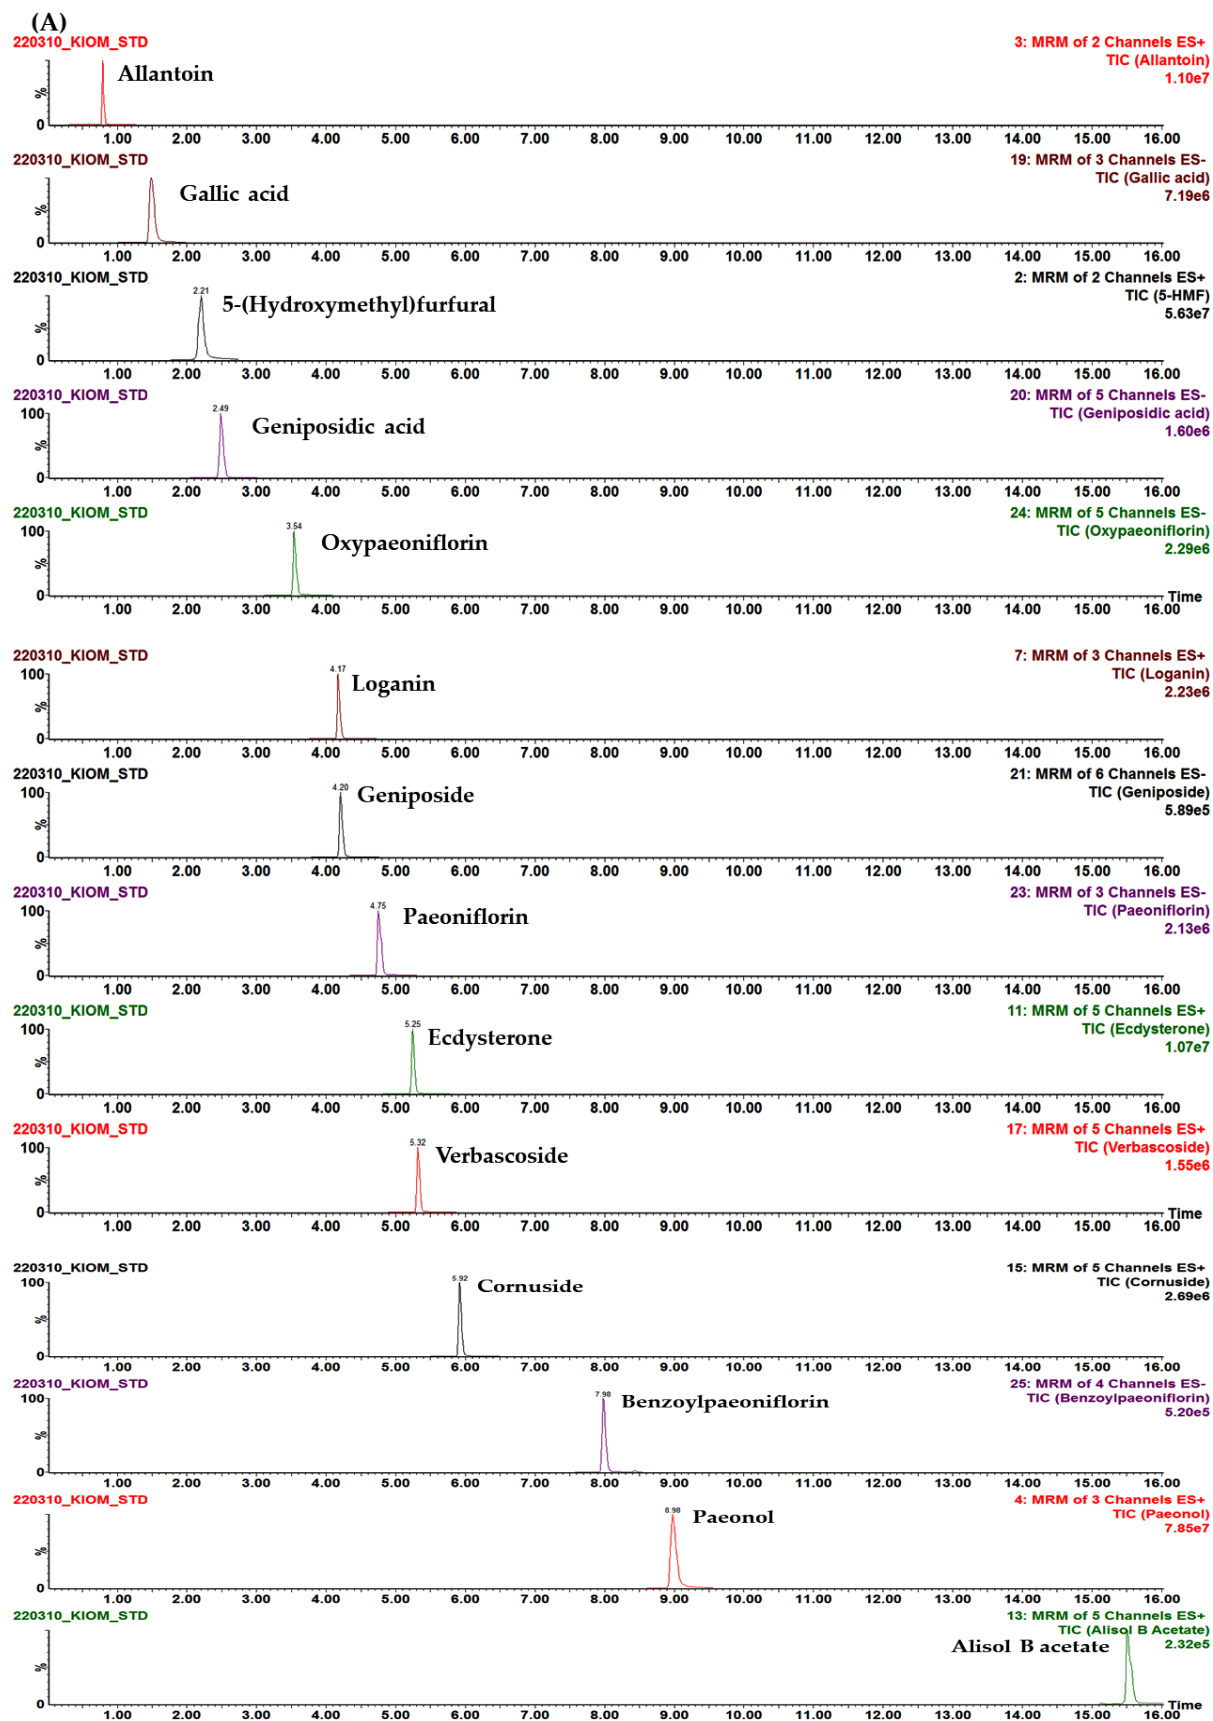

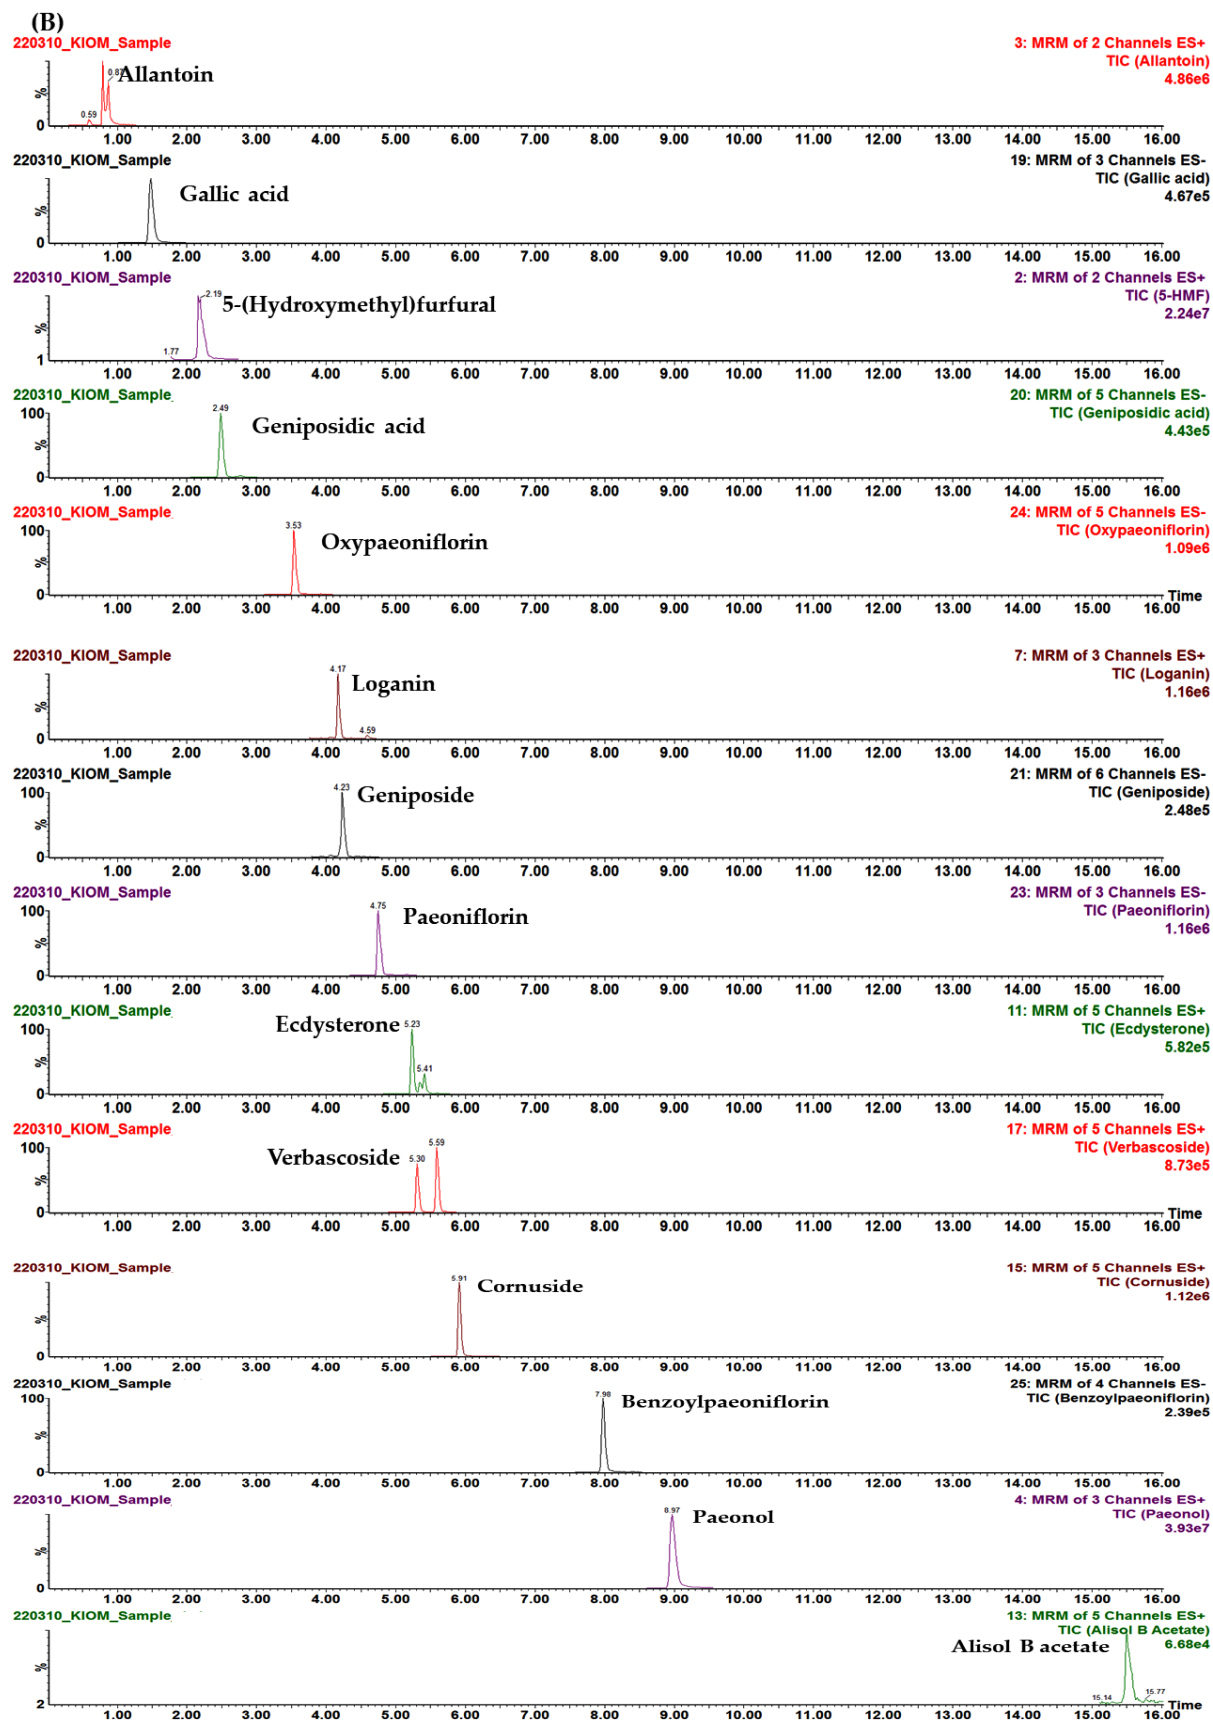

**Figure S6.** Extracted ion chromatograms of each marker compound (A) and GSH sample (B) using the UPLC–MS/MS MRM method in the positive and negative ion modes.



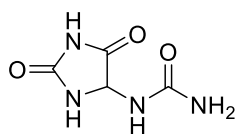

Allantoin (1)

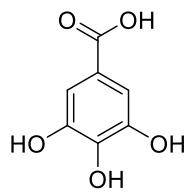

Gallic acid (2)

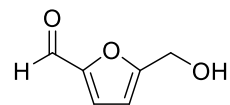

5-(Hydroxymethyl)furfural (3)

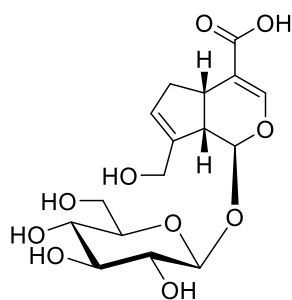

Geniposidic acid (4)

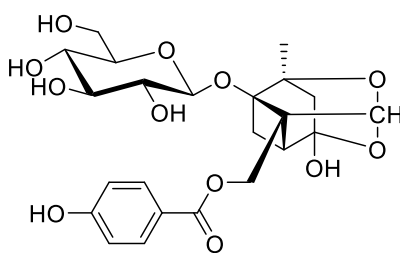

Oxypaeoniflorin (5)

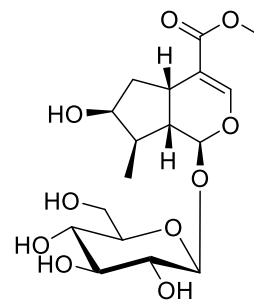

Loganin (6)

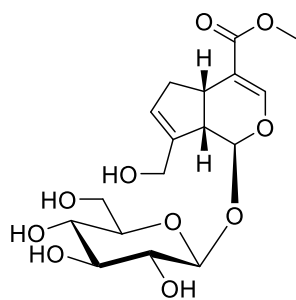

Geniposide (7)

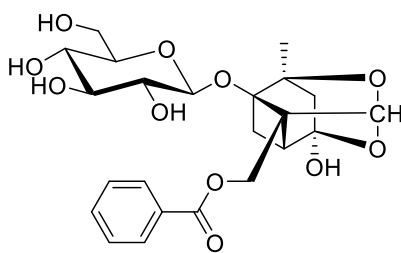

Paeoniflorin (8)

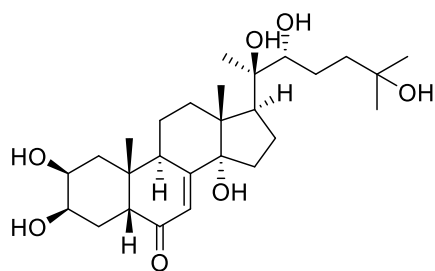

Ecdysterone (9)

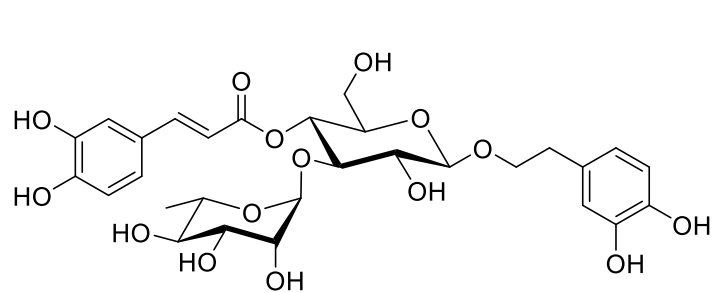

Verbascoside (10)

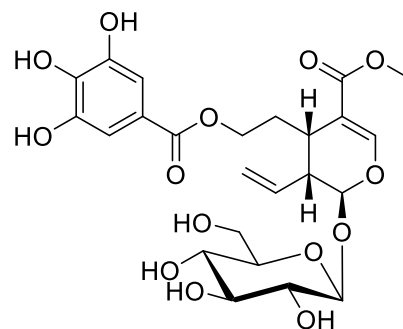

Cornuside (11)

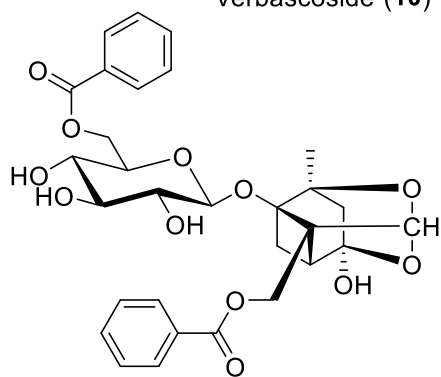

Benzoylpaeoniflorin (12)

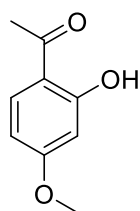

Paeonol (13)

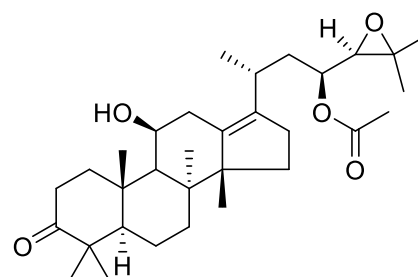

Alisol B acetate (14)

**Figure S7.** Chemical structures of the 14 marker components in GSH.
